# Supplementary material
Source: publisher figshare collection journal article supplement (https://gsajournals.figshare.com/ndownloader/files/24973340)
Supplement: Supplementary file 1 [file 24973340]

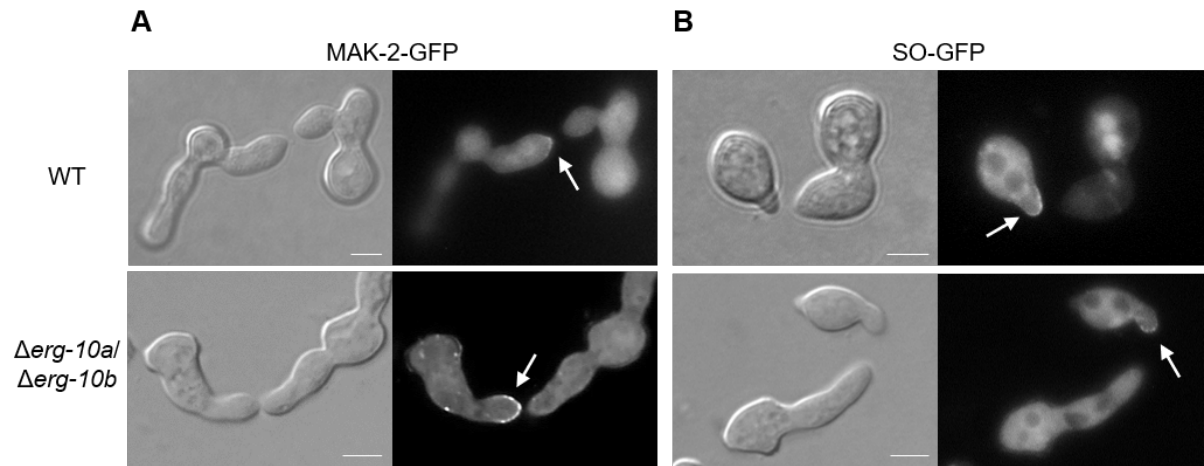

**Figure S1 Interacting germlings of  $\Delta erg-10a/\Delta erg-10b$  show normal membrane recruitment of the signaling proteins MAK-2 and SO.** (A) MAK-2-GFP localizes to one of the two cell tips of interacting WT (N1-41) and  $\Delta erg-10a/\Delta erg-10b$  (MW\_220) germling pairs (arrows). (B) Similar to WT (AF-T8), SO-GFP also localizes to one of the two interacting germling tips in  $\Delta erg-10a/\Delta erg-10b$  (MW\_223) (arrows). Scale bars: 5  $\mu m$ .

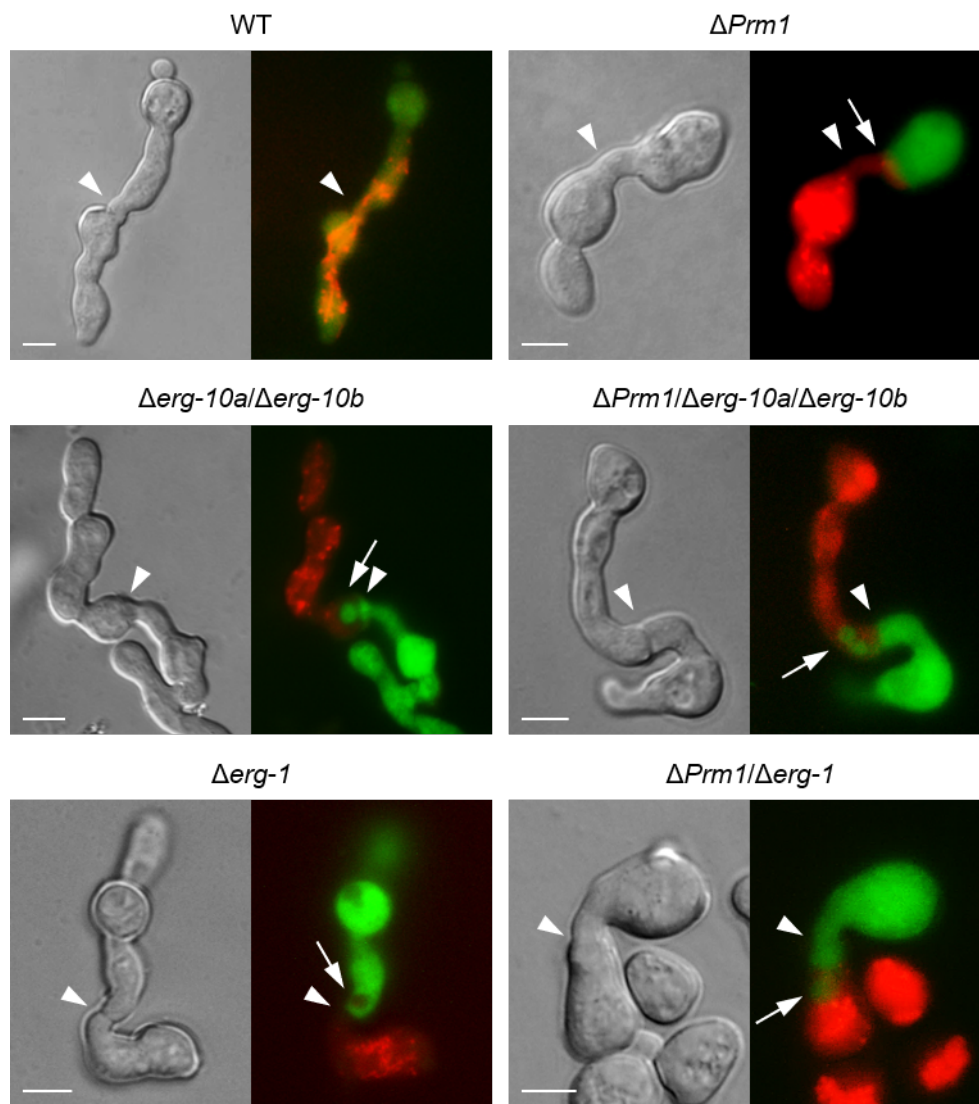

**Figure S2 Germlings of the mutants  $\Delta Prm1$ ,  $\Delta erg-10a$   $\Delta erg-10b$  and  $\Delta erg-1$  are defective in cell-cell fusion.** Germlings of WT and mutant strains expressing cytosolic green and red fluorescing proteins were analyzed for fusion between the interaction partners after physical contact (arrowheads). In contrast to normal fusion in WT cell pairs (N3-06 + N3-07), the cell contents of two germlings of the plasma membrane fusion mutant  $\Delta Prm1$  (A7 + A8) are typically pushed into each other without mixing of the fluorescence colors (arrows). Germling pairs of the sterol biosynthesis mutants  $\Delta erg-10a/\Delta erg-10b$  (MW\_175 + MW\_179) and  $\Delta erg-1$  (MW\_463 + MW\_465) show similar fusion deficiencies. Combining  $\Delta Prm1$  with the deletion of the *erg* genes (MW\_289 + MW\_291; MW\_459 + MW\_455) results in comparable germling fusion defects. Scale bars: 5  $\mu$ m.

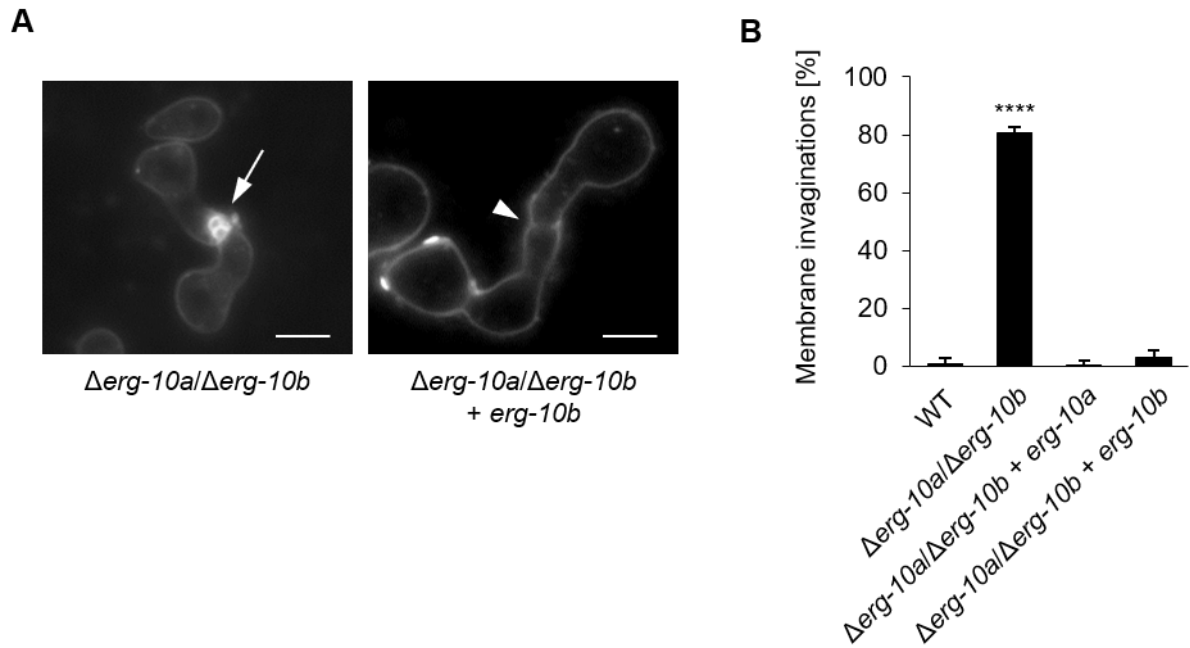

**Figure S3 Complementation of  $\Delta erg-10a/\Delta erg-10b$ .** (A) Fluorescence microscopy images of germling pairs of  $\Delta erg-10a/\Delta erg-10b$  (N4-38) and  $\Delta erg-10a/\Delta erg-10b + erg-10b$  (MW\_631) stained with FM4-64. In contrast to the typical formation of membrane invaginations in cell pairs of the double mutant (arrow), the complemented strain forms a fusion pore between the fusion partners (arrowhead). Scale bars: 5  $\mu m$ . (B) Quantification of membrane invaginations between germling pairs. While the vast majority of  $\Delta erg-10a/\Delta erg-10b$  cell pairs is characterized by membrane fingers as observed in A, these structures are rarely formed in WT (FGSC 2489) and the complemented strains (MW\_630, MW\_631). Values represent the mean  $\pm$  SD from three independent experiments with 100 cell pairs per replicate (\*\*\*\*  $P < 0.0001$ , ANOVA with Tukey's post-hoc test).

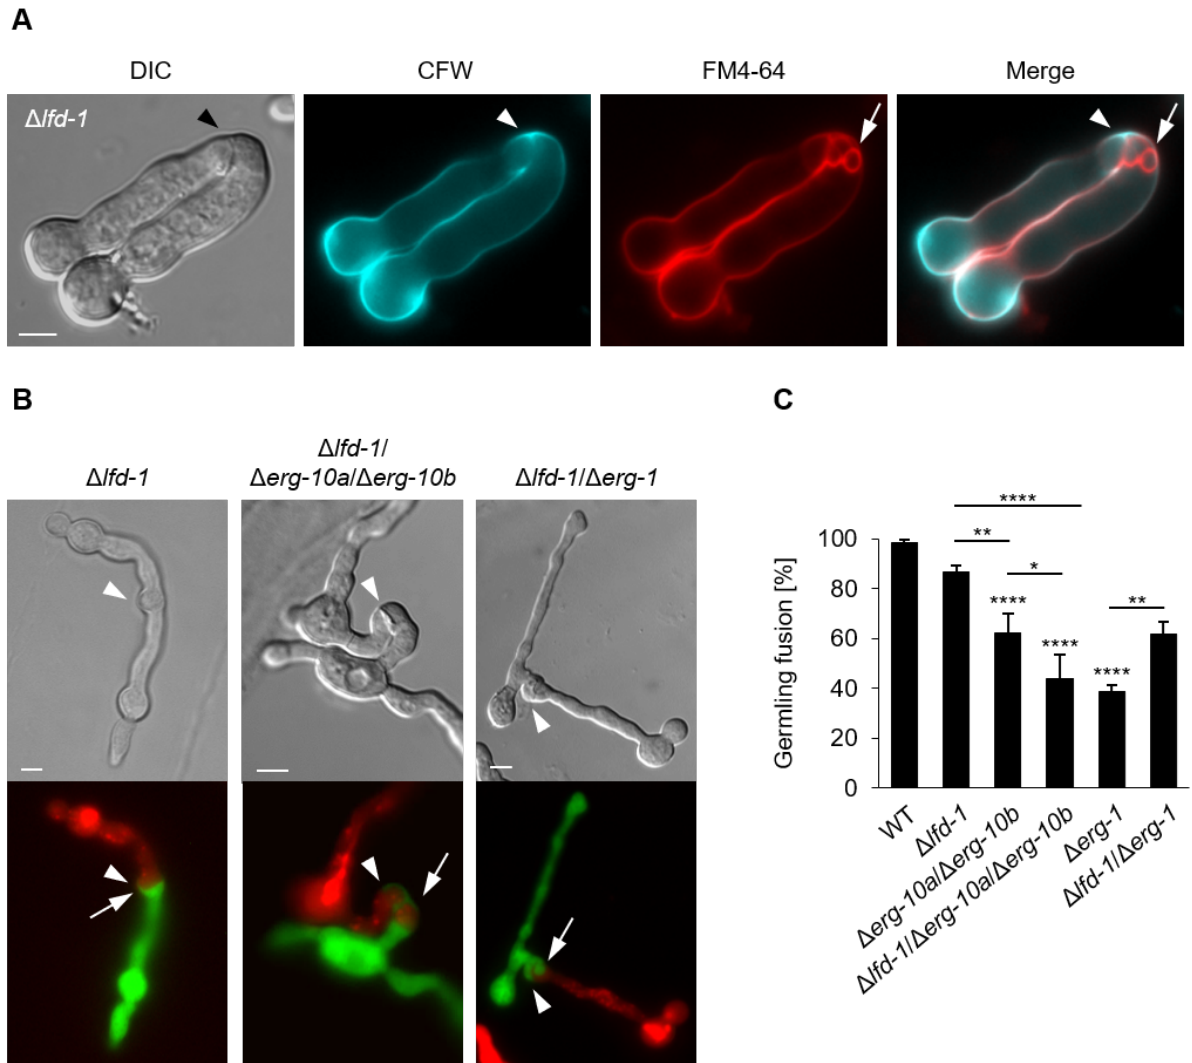

**Figure S4 LFD-1 functions independently of ERG-10a, ERG-10b, and ERG-1.** (A) Simultaneous staining of the cell wall with calcofluor white (CFW) and the cell membrane with FM4-64 in a pair of  $\Delta lfd-1$  germlings (JPG6). The plasma membrane fusion defect of this mutant becomes visible by a membrane invagination (arrow) across the opening in the cell wall (white arrowhead) at the contact site (black arrowhead) of the cell pair. (B) Brightfield and fluorescence images of germling pairs lacking the plasma membrane fusion protein LFD-1 (JPG7 + JPG8), and cell pairs with the additional deletion of the ergosterol biosynthesis genes *erg-10a* and *erg-10b* (MW\_623 + MW\_626) or *erg-1* (MW\_614 + MW\_620). Due to the failure in plasma membrane merger, membrane invaginations (arrows) reach from one cell across the contact site (arrowheads) into the partner cell. Scale bars in A-B: 5  $\mu$ m. (C) Quantification of germling fusion in cell pairs of WT (N3-06 + N3-07),  $\Delta lfd-1$ ,  $\Delta erg-10a/\Delta erg-10b$  (MW\_175 + MW\_179),  $\Delta lfd-1/\Delta erg-10a/\Delta erg-10b$ ,  $\Delta erg-1$  (MW\_463 + MW\_465) and  $\Delta lfd-1/\Delta erg-1$ . Values represent the mean  $\pm$  SD from three independent populations of germlings with 17 to 84 cells per replicate (\*  $P < 0.05$ , \*\*  $P < 0.01$ , \*\*\*\*  $P < 0.0001$ , ANOVA with Tukey's post-hoc test).

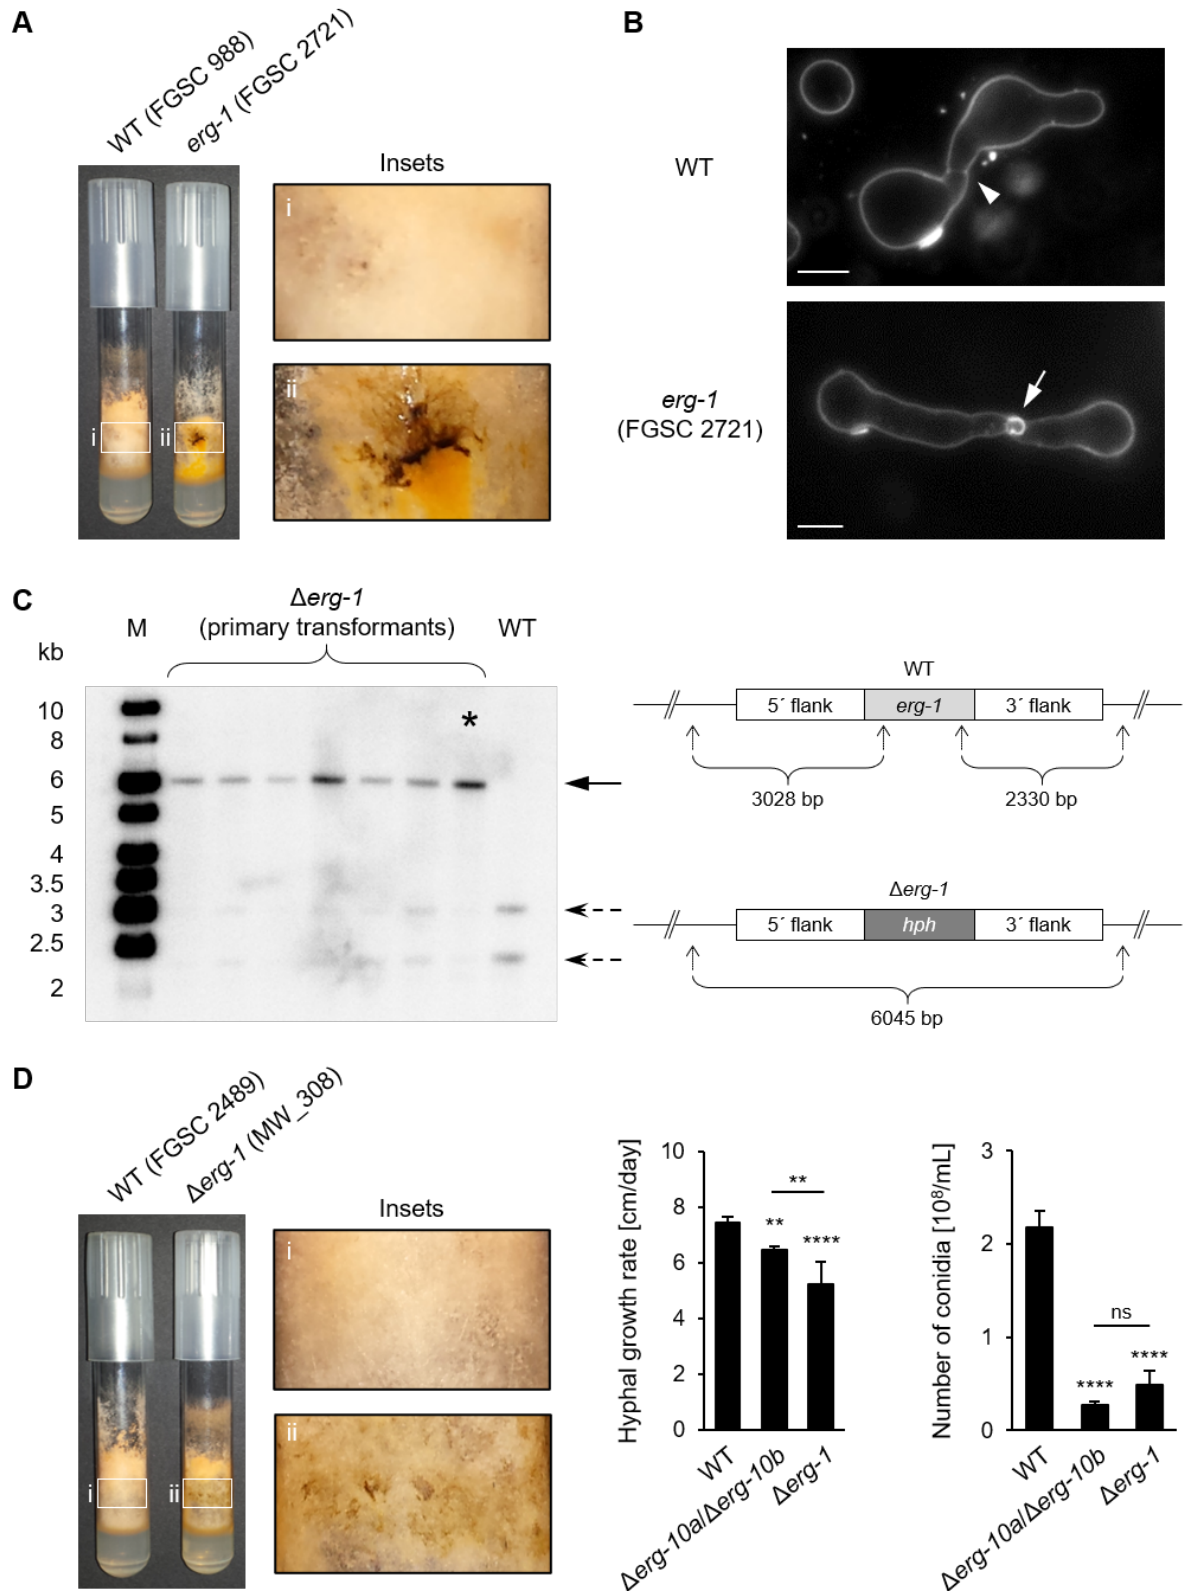

**Figure S5 Construction and phenotypic characterization of the *erg-1* gene deletion mutant.** (A) Growth of a classical *erg-1* mutant in comparison to a WT in flasks containing MM, showing dark pigmentation along the aerial mycelium. (B) Fluorescence microscopy images showing the staining of germling pairs with FM4-64. In contrast to the formation of a fusion pore (arrowhead) between WT germlings

(FGSC 2489), cell pairs of the classical *erg-1* mutant frequently form membrane invaginations after contact (arrow). Scale bars: 5  $\mu$ m. (C) Southern blot analysis of primary transformants for the deletion of *erg-1* in strain FGSC 9719. Genomic DNA of seven mutants and a WT control (FGSC 988) was digested by XhoI, transferred onto a nylon membrane and hybridized with a radioactive probe derived from the entire gene knock-out cassette (left panel). As illustrated by schematic representations of the genomic regions of the gene in WT and  $\Delta$ *erg-1* (right panels, not to scale), the detection of a signal at about 6 kb indicates gene replacement by a hygromycin resistance gene (*hph*) cassette (black arrow). Signals at about 2.3 and 3 kb in the transformants indicate heterokaryotic strains still containing WT nuclei (dotted arrows). Arrows below the genomic sequences depict XhoI restriction sites in the WT and the mutant. One of the isolated primary transformants (strain N3-08, asterisk) was chosen for purification into a homokaryon, resulting in strain MW\_308. (D) Growth phenotypes of the  $\Delta$ *erg-1* mutant strain. Compared to a WT control, the  $\Delta$ *erg-1* mutant typically forms dark pigments along the glass wall of the culture tube (insets). Deletion of *erg-1* also reduces linear hyphal growth rates and the formation of vegetative conidia similar to the  $\Delta$ *erg-10a*/ $\Delta$ *erg-10b* mutant (N4-38). Values represent the mean  $\pm$  SD from three to five cultures per strain (\*\*  $P < 0.01$ , \*\*\*\*  $P < 0.0001$ , ns: not significant, ANOVA with Tukey's post-hoc test).



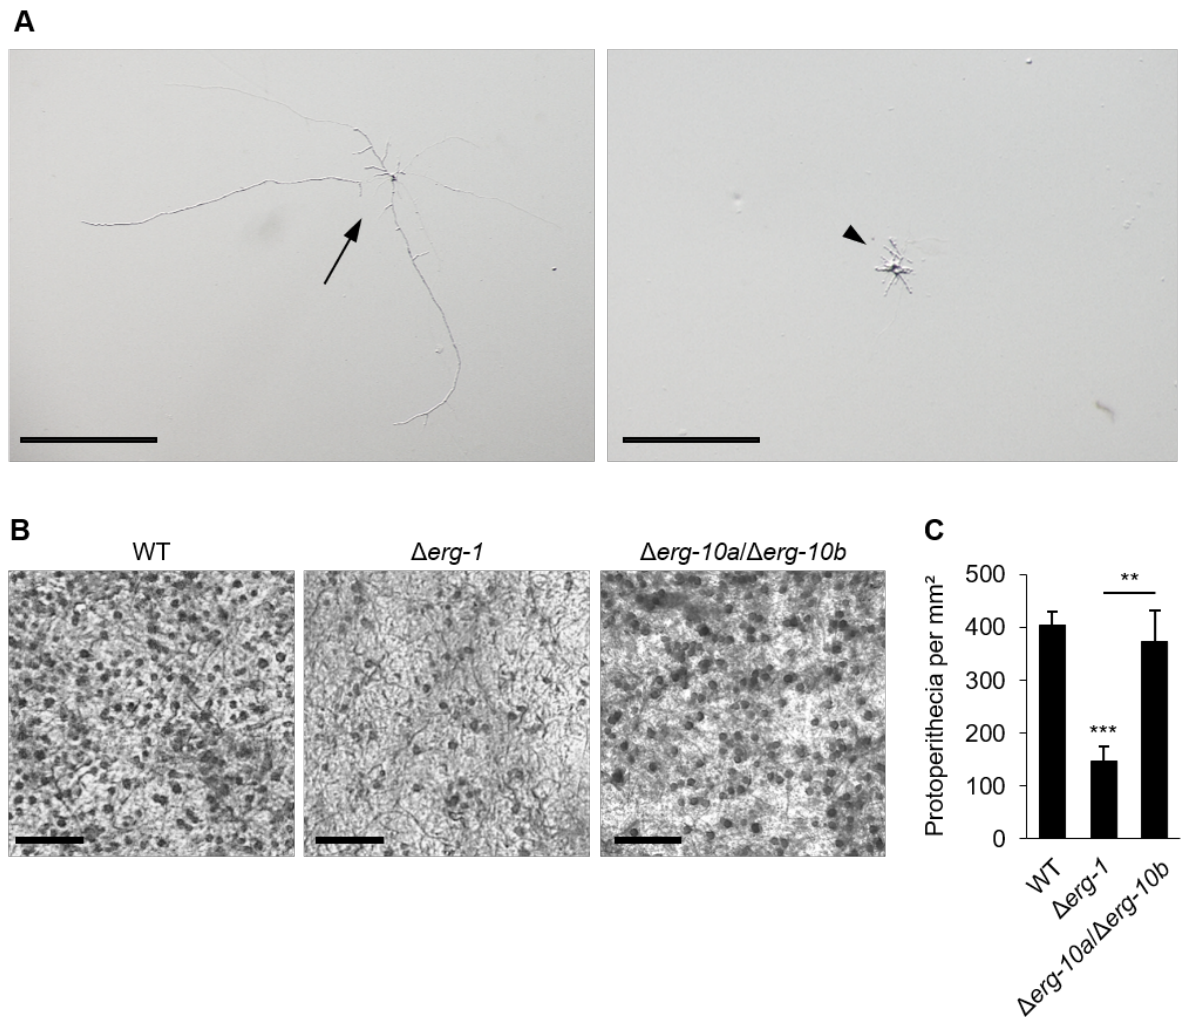

**Figure S6 Deletion of *erg-1* impairs growth of ascospore germlings and the formation of protoperithecia.** (A) Sexual crosses between WT (FGSC 2489) and  $\Delta erg-1$  strains were used to purify the heterokaryotic *erg-1* gene deletion strain (MW\_308) into a homokaryotic mutant. In a population of ascospores grown on MM plates, some microcolonies show strongly delayed growth (arrowhead) as compared to normally growing germlings (arrow). Diagnostic PCR analysis revealed that these slowly growing germlings are homokaryotic for  $\Delta erg-1$  (data not shown). (B) Images of protoperithecia of WT (FGSC 988),  $\Delta erg-10a/\Delta erg-10b$  (N4-37) and  $\Delta erg-1$  (MW\_307) grown for one week on crossing medium. The deletion of *erg-1* reduces the number and size of these unfertilized fruiting bodies, while the lack of *erg-10a* and *erg-10* has no effect at this stage of development. Scale bars in A-B: 500  $\mu$ m. (C) Quantitative evaluation of the number of protoperithecia generated by WT and *erg* mutants from representative images as shown in B. Values represent the mean  $\pm$  SD from three independent cultures per strain (\*\*  $P < 0.01$ , \*\*\*  $P < 0.001$ , ANOVA with Tukey's post-hoc test).

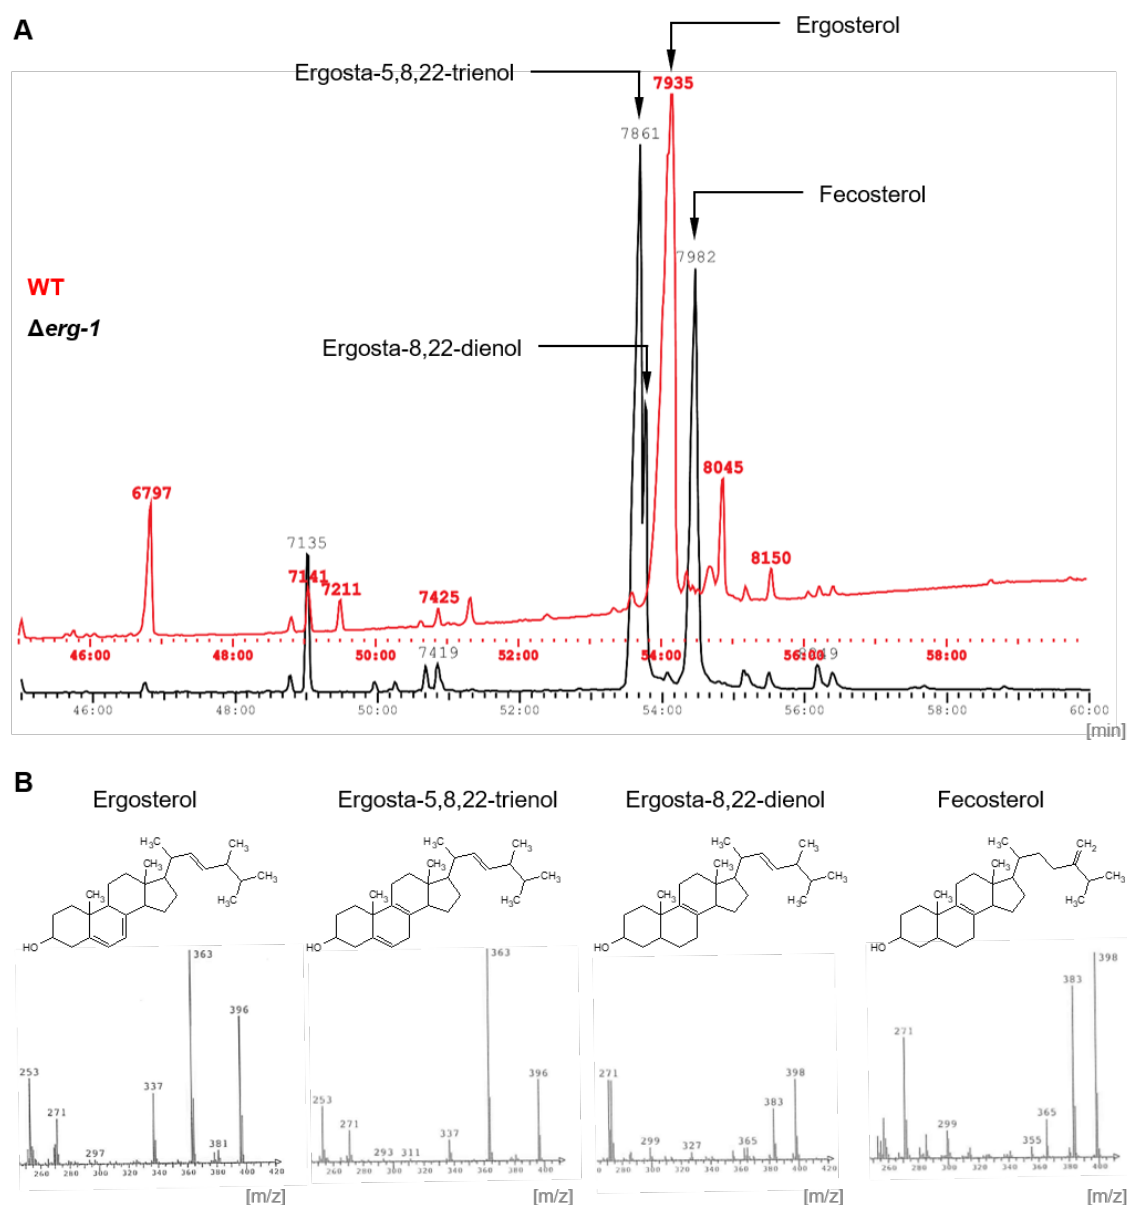

**Figure S7 The ergosterol biosynthesis mutant  $\Delta erg-1$  accumulates sterols with structural alterations in the ring system.** Sterol extracts of WT (FGSC 2489) and  $\Delta erg-1$  (MW\_308) cultures were analyzed by gas chromatography coupled with mass spectrometry (GC/MS). (A) GC analysis of sterols extracts. In contrast to the main sterol in WT, which is ergosterol, the  $\Delta erg-1$  mutant accumulates three sterol intermediates, identified as ergosta-5,8,22-trienol, ergosta-5,8-dienol and fecosterol (ergosta-8,24(28)-dienol). The horizontal scale represents the retention time of these sterols during the GC analysis. (B) Mass spectra and structures of the main sterols detected in WT and  $\Delta erg-1$ . The scales represent mass over charge ratios of the fragments from the sterols that were detected in the GC analysis.



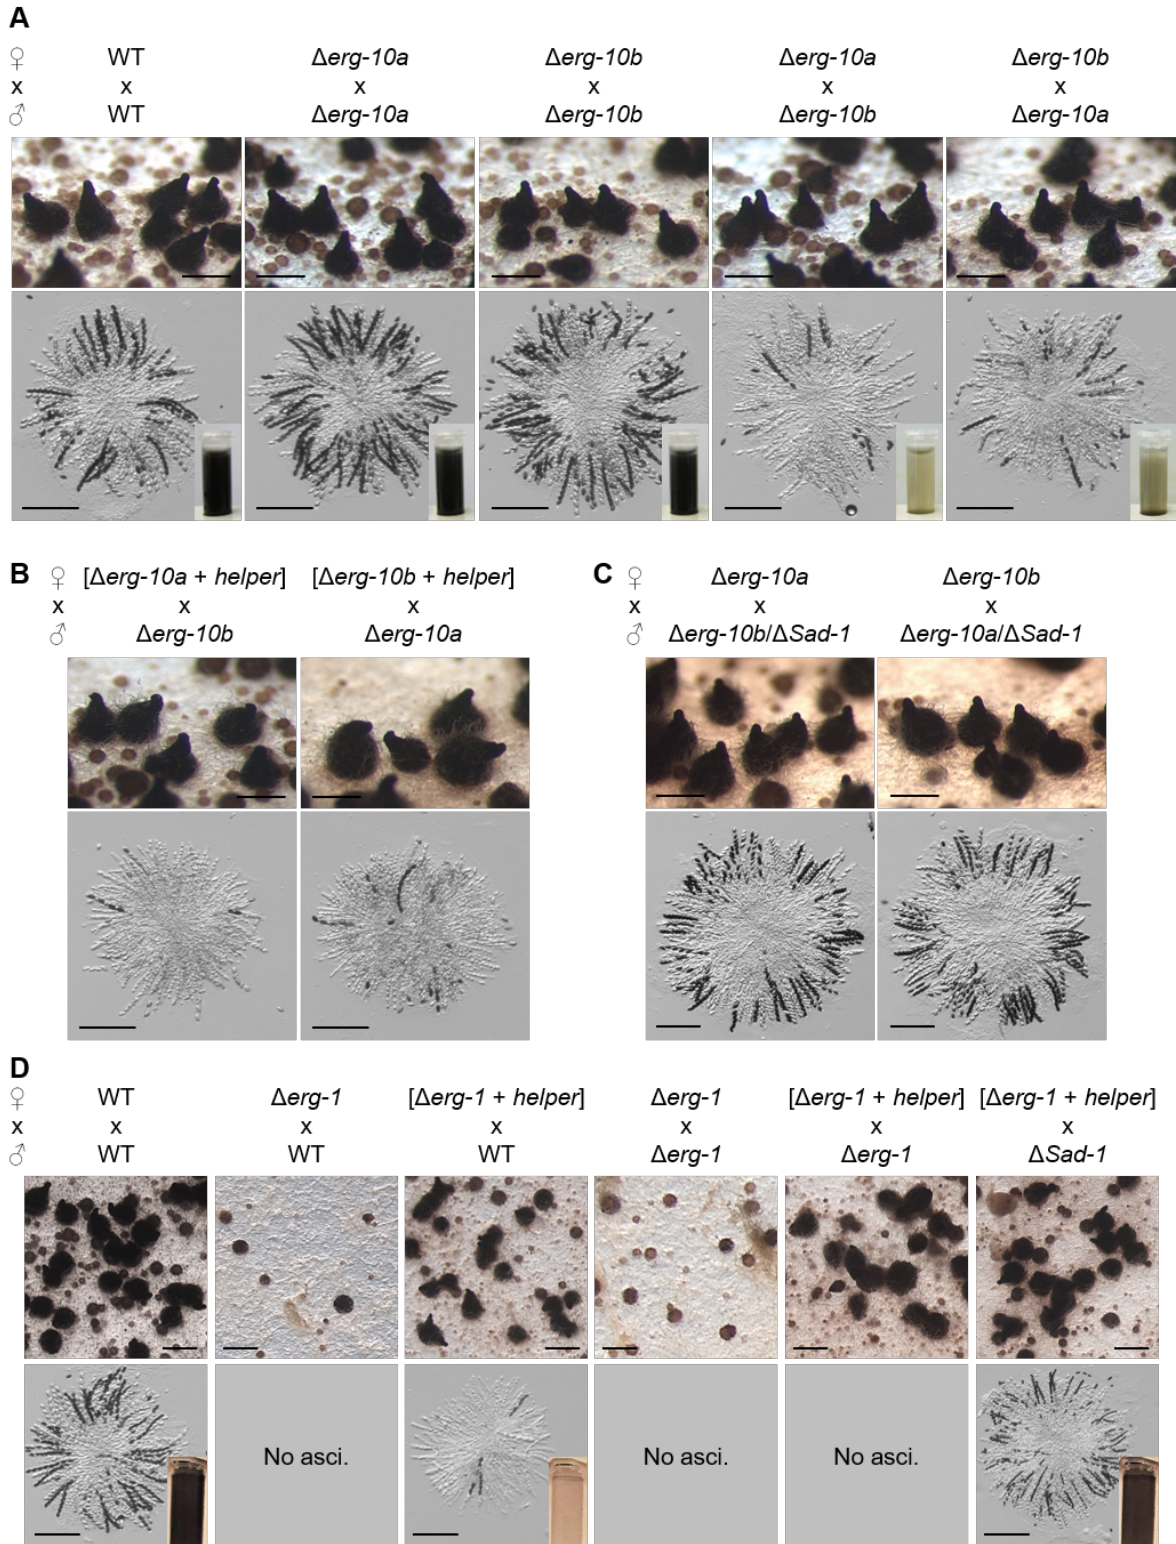

**Figure S8 The reduced fertility of heterozygous crosses between  $\Delta erg-10a$  and  $\Delta erg-10b$  and the strong fertility defects of  $\Delta erg-1$  are fully rescued by a combination of the *helper* strain and the suppressor  $\Delta Sad-1$ .** (A-C) Crosses (*mat a* x *mat A*) between WT (FGSC 2489, FGSC 988),  $\Delta erg-10a$  (FGSC 20056, FGSC 20057) and  $\Delta erg-10b$  (FGSC 13983, N4-30). (A) Heterozygous crosses between  $\Delta erg-10a$  and  $\Delta erg-10b$  produce WT-like fruiting bodies (top panels) and asci (bottom panels), but generate reduced amounts of black ascospores (inset images). (B)

Forced heterokaryons between the *helper* strain (FGSC 4564) and  $\Delta erg-10a$  (MW\_116) or  $\Delta erg-10b$  (MW\_185) do not rescue ascospore development in heterozygous crosses between these *erg* mutants. (C) The deletion of the suppressor *Sad-1* in one of the crossing partners (MW\_209, MW\_212) fully compensates for the impaired formation of ascospores in heterozygous crosses between  $\Delta erg-10a$  and  $\Delta erg-10b$ . (D) Crosses (*mat A* x *mat a*) between WT,  $\Delta erg-1$  (MW\_308, MW\_307, MW\_347), the *helper* strain and  $\Delta Sad-1$  (FGSC 11151) were analyzed for the formation of perithecia, asci and ascospores. Homozygous crosses between  $\Delta erg-1$  are infertile, which is not alleviated by using a forced heterokaryon with the *helper* strain. While crosses between the heterokaryon and WT are still defective, the additional use of  $\Delta Sad-1$  as the male crossing partner fully restores female fertility of  $\Delta erg-1$ . Scale bars: 500  $\mu$ m for perithecia, 200  $\mu$ m for rosettes of asci.

**Table S1 Strains of *Neurospora crassa* used and constructed in this study.**

| Strain     | Genotype                                                                                 | Origin                            |
|------------|------------------------------------------------------------------------------------------|-----------------------------------|
| A7         | $\Delta Prm1::hph$ , $\Delta mus-51::bar$ , $his-3^+::Pccg-1-gfp$ , <i>mat A</i>         | Fleissner <i>et al.</i> 2009      |
| A8         | $\Delta Prm1::hph$ , $\Delta mus-51::bar$ , $his-3^+::Pccg-1-dsRed$ , <i>mat A</i>       | Fleissner <i>et al.</i> 2009      |
| A24        | $\Delta Prm1::hph$ , $\Delta mus-51::bar$ , $his-3^+::Pccg-1-Prm1-gfp$ , <i>mat A</i>    | Fleissner <i>et al.</i> 2009      |
| A32        | $\Delta Prm1::hph$ , <i>mat A</i>                                                        | Fleissner <i>et al.</i> 2009      |
| AF-T8      | $his-3^+::Pccg-1-so-gfp$ , <i>mat A</i>                                                  | Fleissner and Glass 2007          |
| FGSC 988   | <i>mat a</i>                                                                             | FGSC                              |
| FGSC 2489  | <i>mat A</i>                                                                             | FGSC                              |
| FGSC 2721  | <i>erg-1</i> (allele <i>uv1</i> ), <i>mat A</i>                                          | FGSC                              |
| FGSC 4564  | <i>a<sup>m1</sup></i> , <i>ad-3B</i> , <i>cyh-1</i> (helper strain)                      | FGSC                              |
| FGSC 6103  | <i>his-3</i> , <i>mat A</i>                                                              | FGSC                              |
| FGSC 9716  | <i>his-3</i> , <i>mat a</i>                                                              | FGSC                              |
| FGSC 9719  | $\Delta mus-52::bar$ , <i>mat a</i>                                                      | FGSC                              |
| FGSC 11151 | $\Delta Sad-1::hph$ , <i>mat a</i>                                                       | FGSC                              |
| FGSC 11152 | $\Delta Sad-1::hph$ , <i>mat A</i>                                                       | FGSC                              |
| FGSC 13983 | $\Delta erg-10b::hph$ , <i>mat a</i>                                                     | FGSC                              |
| FGSC 20056 | $\Delta erg-10a::hph$ , <i>mat a</i>                                                     | FGSC                              |
| FGSC 20057 | $\Delta erg-10a::hph$ , <i>mat A</i>                                                     | FGSC                              |
| JPG6       | $\Delta lfd-1::hph$ , <i>mat a</i>                                                       | Palma-Guerrero <i>et al.</i> 2014 |
| JPG7       | $\Delta lfd-1::hph$ , $his-3^+::Pccg-1-gfp$ , <i>mat a</i>                               | Palma-Guerrero <i>et al.</i> 2014 |
| JPG8       | $\Delta lfd-1::hph$ , $his-3^+::Pccg-1-mCherry$ , <i>mat a</i>                           | Palma-Guerrero <i>et al.</i> 2014 |
| MW_103     | $\Delta erg-10b::hph$ , $his-3^+::Pccg-1-gfp$ , <i>mat A</i>                             | This study                        |
| MW_105     | $\Delta erg-10b::hph$ , $his-3^+::Pccg-1-mCherry$ , <i>mat A</i>                         | This study                        |
| MW_116     | $\Delta erg-10a::hph$ , <i>his-3</i> , <i>mat A</i>                                      | This study                        |
| MW_126     | $\Delta erg-10a::hph$ , $\Delta erg-10b::hph$ , <i>his-3</i> , <i>mat A</i>              | This study                        |
| MW_149     | $\Delta erg-2::hph$ , $\Delta erg-11::hph$ , $his-3^+::Pccg-1-gfp$ , <i>mat A</i>        | This study                        |
| MW_150     | $\Delta erg-2::hph$ , $\Delta erg-11::hph$ , $his-3^+::Pccg-1-mCherry$ , <i>mat A</i>    | This study                        |
| MW_175     | $\Delta erg-10a::hph$ , $\Delta erg-10b::hph$ , $his-3^+::Pccg-1-gfp$ , <i>mat A</i>     | This study                        |
| MW_179     | $\Delta erg-10a::hph$ , $\Delta erg-10b::hph$ , $his-3^+::Pccg-1-mCherry$ , <i>mat A</i> | This study                        |
| MW_181     | $\Delta erg-10a::hph$ , $\Delta erg-10b::hph$ , $his-3^+::Pccg-1-gfp$ , <i>mat A</i>     | This study                        |
| MW_184     | $\Delta erg-10b::hph$ , <i>his-3</i> , <i>mat A</i>                                      | This study                        |
| MW_185     | $\Delta erg-10b::hph$ , <i>his-3</i> , <i>mat a</i>                                      | This study                        |
| MW_199     | $\Delta erg-10a::hph$ , $\Delta Prm1::hph$ , $his-3^+::Pccg-1-Prm1-gfp$ , <i>mat A</i>   | This study                        |

|          |                                                                                                               |                              |
|----------|---------------------------------------------------------------------------------------------------------------|------------------------------|
| MW_209   | $\Delta$ erg-10a::hph, $\Delta$ Sad-1::hph, mat A                                                             | This study                   |
| MW_212   | $\Delta$ erg-10b::hph, $\Delta$ Sad-1::hph, mat A                                                             | This study                   |
| MW_220   | $\Delta$ erg-10a::hph, $\Delta$ erg-10b::hph, his-3 <sup>+</sup> ::Pccg-1-mak-2-gfp, mat A                    | This study                   |
| MW_223   | $\Delta$ erg-10a::hph, $\Delta$ erg-10b::hph, his-3 <sup>+</sup> ::Pccg-1-so-gfp, mat A                       | This study                   |
| MW_245   | $\Delta$ Prm1::hph, his-3 <sup>+</sup> ::Pccg-1-Prm1-gfp, mat a                                               | This study                   |
| MW_275   | $\Delta$ erg-10a::hph, $\Delta$ Prm1::hph, his-3 <sup>+</sup> ::Pccg-1-Prm1-gfp, mat a                        | This study                   |
| MW_277.1 | $\Delta$ erg-10a::hph, $\Delta$ erg-10b::hph, $\Delta$ Prm1::hph his-3, mat A                                 | This study                   |
| MW_281   | $\Delta$ erg-10a::hph, $\Delta$ erg-10b::hph, $\Delta$ Prm1::hph, mat A                                       | This study                   |
| MW_289   | $\Delta$ erg-10a::hph, $\Delta$ erg-10b::hph, $\Delta$ Prm1::hph, his-3 <sup>+</sup> ::Pccg-1-gfp, mat A      | This study                   |
| MW_291   | $\Delta$ erg-10a::hph, $\Delta$ erg-10b::hph, $\Delta$ Prm1::hph, his-3 <sup>+</sup> ::Pccg-1-mCherry, mat A  | This study                   |
| MW_307   | $\Delta$ erg-1::hph, mat a                                                                                    | This study                   |
| MW_308   | $\Delta$ erg-1::hph, mat A                                                                                    | This study                   |
| MW_346   | $\Delta$ erg-1::hph, his-3 <sup>+</sup> ::Pccg-1-h1-gfp, mat A                                                | This study                   |
| MW_347   | $\Delta$ erg-1, his-3, mat A                                                                                  | This study                   |
| MW_368   | $\Delta$ erg-1::hph, $\Delta$ Prm1::hph, mat A                                                                | This study                   |
| MW_450   | $\Delta$ erg-1::hph, $\Delta$ Prm1::hph, his-3, mat A                                                         | This study                   |
| MW_455   | $\Delta$ erg-1::hph, $\Delta$ Prm1::hph, his-3 <sup>+</sup> ::Pccg-1-mCherry, mat A                           | This study                   |
| MW_459   | $\Delta$ erg-1::hph, $\Delta$ Prm1::hph, his-3 <sup>+</sup> ::Pccg-1-gfp, mat A                               | This study                   |
| MW_463   | $\Delta$ erg-1::hph, his-3 <sup>+</sup> ::Pccg-1-gfp, mat A                                                   | This study                   |
| MW_465   | $\Delta$ erg-1::hph, his-3 <sup>+</sup> ::Pccg-1-mCherry, mat A                                               | This study                   |
| MW_614   | $\Delta$ erg-1::hph, $\Delta$ lfd-1::hph, his-3 <sup>+</sup> ::Pccg-1-gfp, mat a                              | This study                   |
| MW_620   | $\Delta$ erg-1::hph, $\Delta$ lfd-1::hph, his-3 <sup>+</sup> ::Pccg-1-mCherry, mat a                          | This study                   |
| MW_623   | $\Delta$ erg-10a::hph, $\Delta$ erg-10b::hph, $\Delta$ lfd-1::hph, his-3 <sup>+</sup> ::Pccg-1-gfp, mat a     | This study                   |
| MW_626   | $\Delta$ erg-10a::hph, $\Delta$ erg-10b::hph, $\Delta$ lfd-1::hph, his-3 <sup>+</sup> ::Pccg-1-mCherry, mat a | This study                   |
| MW_630   | $\Delta$ erg-10a::hph, $\Delta$ erg-10b::hph, his-3 <sup>+</sup> ::Pccg-1-erg-10a, mat A                      | This study                   |
| MW_631   | $\Delta$ erg-10a::hph, $\Delta$ erg-10b::hph, his-3 <sup>+</sup> ::Pccg-1-erg-10b, mat A                      | This study                   |
| N1-41    | his-3 <sup>+</sup> ::Pccg-1-mak-2-gfp, mat A                                                                  | Weichert <i>et al.</i> 2016  |
| N2-12    | his-3 <sup>+</sup> ::Pccg-1-h1-gfp, mat A                                                                     | Gift from D. J. Jacobson     |
| N3-06    | his-3 <sup>+</sup> ::Pccg-1-gfp, mat A                                                                        | Fleissner <i>et al.</i> 2009 |
| N3-07    | his-3 <sup>+</sup> ::Pccg-1-mCherry, mat A                                                                    | Schürg <i>et al.</i> 2012    |
| N3-08    | $\Delta$ erg-1::hph, $\Delta$ mus-52::bar, mat a                                                              | This study                   |

|       |                                                                |                             |
|-------|----------------------------------------------------------------|-----------------------------|
| N4-30 | <i>Δerg-10b::hph, mat A</i>                                    | Weichert <i>et al.</i> 2016 |
| N4-37 | <i>Δerg-10a::hph, Δerg-10b::hph, mat a</i>                     | This study                  |
| N4-38 | <i>Δerg-10a::hph, Δerg-10b::hph, mat A</i>                     | Weichert <i>et al.</i> 2016 |
| N5-01 | <i>Δerg-10a::hph, his-3<sup>+</sup>::Pccg-1-gfp, mat A</i>     | This study                  |
| N5-02 | <i>Δerg-10a::hph, his-3<sup>+</sup>::Pccg-1-mCherry, mat A</i> | This study                  |
| N5-03 | <i>Δerg-11::hph, his-3<sup>+</sup>::Pccg-1-gfp, mat A</i>      | This study                  |
| N5-04 | <i>Δerg-11::hph, his-3<sup>+</sup>::Pccg-1-mCherry, mat A</i>  | This study                  |

**Table S2 Oligonucleotides used in this study.**

| No.  | Name                | Nucleotide sequence (5'–3')                                |
|------|---------------------|------------------------------------------------------------|
| 21   | his-3-f             | CTTGCAGTCTTGCACGTTG                                        |
| 22   | his-3-r             | CTCTCGAGTCCCGTTATTGC                                       |
| 42   | prm-f               | ATTATTATCTAGAATGGTTTACAACGAAAAGAATGG<br>AGG                |
| 43   | prm-r               | ATCATCATTAATTAATCCTCCTCCTCCTCCAAT<br>AGGCGTAAAATACCC       |
| 82   | HPH F               | GTCGGAGACAGAAGATGATATTGAAGGAGC                             |
| 83   | HPH R               | GTTGGAGATTTTCAGTAACGTTAAGTGGAT                             |
| 103  | erg1-5F             | GTAACGCCAGGGTTTTCCAGTCACGACGCGTAG<br>ATCTTTACCCTGTCC       |
| 104  | erg1-5R             | ATCCACTTAACGTTACGTTACTGAAATCTCCAACC<br>CAACCTCAACAAACCTACC |
| 105  | erg1-3F             | CTCCTTCAATATCATCTTCTGTCTCCGACACCTTC<br>GTAGAGAATGCACG      |
| 106  | erg1-3R             | GCGGATAACAATTTACACAGGAAACACCCGGTA<br>GTACTAAGCTGAACG       |
| 312  | erg-1-test-f        | TGGGATGCTTGCTTGTGATGCG                                     |
| 315  | erg-10a-test-f      | TTTCTGTGGGAGGGGAGATGTCTGG                                  |
| 317  | hph-test-r          | TCGTCCGAGGGCAAAGGAATAGAG                                   |
| 338  | erg-1-f             | CTCTTCCTCCGGTTCGTCTTGCC                                    |
| 339  | erg-1-r             | CAAGTTGCTAATCATCTCGCGGCCG                                  |
| 344  | erg-10a-f           | ACGACCTGCTCTCTATGATTTCCC                                   |
| 345  | erg-10a-r           | CTCCTTGACAATCTTCTCCATCTCG                                  |
| 386  | erg-10b-test-f      | GTAGAGCGATATGTAGGTGCTGGCC                                  |
| 387  | erg-10b-f           | GCTCCTATACTGGGTGTTTAGCG                                    |
| 388  | erg-10b-r           | CATGTGATGCAGTGTGTGGTGGG                                    |
| 417  | prm1-test-f         | TGAAGATGGTGAAGACGTCGG                                      |
| 569  | sad-1-hph-test-f    | ACTCGATTGGCTGGGGTAAGAAGG                                   |
| 576  | sad-1-f             | GGAACCTCTCAAGGATCATGCAGCC                                  |
| 577  | sad-1-r             | GGAACACCAAGAGACGAGAGAACGG                                  |
| 626  | prm1-wt-test-r      | AAGAGAGAGTGGGACTGGAGGG                                     |
| 676  | erg-1-f-seq         | GGTGGTGGAATCTCTGTGGCC                                      |
| 677  | erg-1-r-seq         | TCTAGCGTAGACGCCGCTTGTGC                                    |
| 1078 | lfd-1-test-f        | CGCAACCTCAACATATCATT                                       |
| 1079 | lfd-1-f             | ATGGCTGTCAACGTGAACGA                                       |
| 1080 | lfd-1-r             | TCAAGCATCTCCTGCATTCA                                       |
| 1445 | erg-10a_Prom_Pacl_F | AATGTATTAATTAATTTTTGTTATTGCCAACTTG                         |
| 1446 | erg-10a_Term_NotI_R | AATGTAGCGGCCGCGCTTATCTCCGGTTCAACGG                         |
| 1447 | erg-10b_Prom_Pacl_F | AATGTATTAATTAAGCAGTATACACTAGGACTTA                         |
| 1448 | erg-10b_Term_NotI_R | AATGTAGCGGCCGCCTAAACCTCTCTGTTGTCTG                         |
